# Supplementary material
Source: Research Square preprint supplement (doi:10.21203/rs.3.rs-8981414/v1)
Supplement: Supplementary file 1 [file b250159c992d7ab2968b53ea.docx]

**Date: Aug 8, 2025**

**Embase (15 records):**

(‘three-dimensional imaging’/exp OR ‘Three-Dimensional’:ab,ti OR ‘Three Dimensional’:ab,ti OR ‘3-D’:ab,ti OR ‘3 D’:ab,ti) AND (‘Black Blood’:ab,ti OR ‘Black-Blood’:ab,ti OR ‘Dark Blood’:ab,ti ‘Dark-Blood’:ab,ti) AND (‘thoracic aorta’/exp OR ‘thoracic aortic wall’/exp OR ‘Thoracic Aort*’:ab,ti OR ‘Ascending Aort*’:ab,ti OR ‘Aortic Arch’:ab,ti OR ‘Aorta Arch’:ab,ti OR ‘Arch of the Aort*’:ab,ti OR ‘Descending Aort*’:ab,ti OR ‘Aortic Root*’:ab,ti OR ‘Aorta Root*’:ab,ti OR ‘aorta thoracic*’:ab,ti OR ‘thorax aort*’:ab,ti OR ‘thoracic aortic wall’:ab,ti OR ‘sinotubular junction*’:ab,ti OR ‘Aort*’:ab,ti)

**PubMed (37 records):**

(Imaging, Three-Dimensional[mesh] OR Three-Dimensional[tiab] OR Three Dimensional[tiab] OR 3-D[tiab] OR 3 D[tiab]) AND (Black Blood[tiab] OR Black-Blood[tiab] OR Dark Blood[tiab] OR Dark-Blood[tiab]) AND (Aorta, Thoracic[mesh] OR Thoracic Aort*[tiab] OR Ascending Aort*[tiab] OR Aortic Arch*[tiab] OR Aorta Arch*[tiab] OR Arch of the Aort*[tiab] OR Descending Aort*[tiab] OR Aortic Root*[tiab] OR Aorta Root*[tiab] OR aorta thoracic*[tiab] OR thorax aort*[tiab] OR thoracic aortic wall[tiab] OR sinotubular junction*[tiab] OR Aort*[tiab])

**Scopus (57 records):**

TITLE-ABS-KEY(“Three-Dimensional” OR “Three Dimensional” OR “3-D” OR “3 D”) AND TITLE-ABS-KEY(“Black Blood” OR “Black-Blood” OR “Dark Blood” OR “Dark-Blood”) AND TITLE-ABS-KEY(“Thoracic Aort*” OR “Ascending Aort*” OR “Aortic Arch*” OR “Aorta Arch*” OR “Arch of the Aort*” OR “Descending Aort*” OR “Aortic Root*” OR “Aorta Root*” OR “aorta thoracic*” OR “thorax aort*” OR “thoracic aortic wall” OR “sinotubular junction*” OR “Aort*”)

**Web of Science (27 records):**

TS=(“Three-Dimensional” OR “Three Dimensional” OR “3-D” OR “3 D”) AND TS=(“Black Blood” OR “Black-Blood” OR “Dark Blood” OR “Dark-Blood”) AND TS=(“Thoracic Aort*” OR “Ascending Aort*” OR “Aortic Arch*” OR “Aorta Arch*” OR “Arch of the Aort*” OR “Descending Aort*” OR “Aortic Root*” OR “Aorta Root*” OR “aorta thoracic*” OR “thorax aort*” OR “thoracic aortic wall” OR “sinotubular junction*” OR “Aort*”)
